# Supplementary material
Source: PubMed Central journal article supplement (PMC5629331)
Supplement: 669FileS1.pdf [file 669FileS1.pdf]

# Supplementary Information

## Accumulation of deleterious mutations during bacterial range expansions

Lars Bosshard<sup>1,2\*</sup>, Isabelle Dupanloup<sup>1,2,3</sup>, Olivier Tenaillon<sup>4</sup>, Rémy Bruggmann<sup>2,5</sup>,  
Martin Ackermann<sup>6,7</sup>, Stephan Peischl<sup>2,5</sup>, Laurent Excoffier<sup>1,2\*</sup>

<sup>1</sup> CPMG, Institute of Ecology and Evolution, University of Berne, 3012 Berne, Switzerland

<sup>2</sup> Swiss Institute of Bioinformatics, 1015 Lausanne, Switzerland

<sup>3</sup> Swiss Integrative Center for Human Health SA, 1700 Fribourg, Switzerland

<sup>4</sup> INSERM, IAME, UMR 1137, Paris, France ; Université Paris Diderot, Sorbonne Paris Cité, Paris, France

<sup>5</sup> Interfaculty Bioinformatics Unit, University of Berne, 3012 Berne, Switzerland

<sup>6</sup> Institute of Biogeochemistry and Pollutant Dynamics, Swiss Federal Institute of Technology Zurich (ETH Zürich), 8092 Zürich, Switzerland

<sup>7</sup> Department of Environmental Microbiology, Swiss Federal Institute of Aquatic Science and Technology (Eawag), 8600 Dübendorf, Switzerland

## Supplementary Tables

**Supplementary Table 1:** Next generation sequencing coverage properties

| Sample name | Sample size | Sequencing platform | Mean coverage | 95% CI      |             |
|-------------|-------------|---------------------|---------------|-------------|-------------|
|             |             |                     |               | Lower bound | Upper bound |
| HMR exp 1   | 48          | HiSeq2500           | 315.9         | 297.61      | 334.19      |
| HMR exp 2   | 9           | MiSeq               | 123.51        | 104.44      | 142.58      |
| LMR exp 2   | 10          | MiSeq               | 103.44        | 85.89       | 120.99      |
| chemostat   | 7           | HiSeq3000           | 706.86        | 590.98      | 822.73      |

**Supplementary Table 2:** Type and number of mutations observed in bacterial strains

|                                                                      | Agar HMR<br>(n=57) | Agar LMR<br>(n=10) | Chemostat HMR<br>(n=7) |
|----------------------------------------------------------------------|--------------------|--------------------|------------------------|
| <b>Mutation types</b>                                                |                    |                    |                        |
| <i>Point substitutions</i>                                           |                    |                    |                        |
| Non synonymous substitution                                          | 3160               | 148                | 57                     |
| Non synonymous substitution affecting a start codon                  | 8                  | -                  |                        |
| Non synonymous substitution affecting a stop codon                   | 69                 | 5                  | 1                      |
| Synonymous substitution                                              | 1577               | 69                 | 22                     |
| Intergenic substitution                                              | 986                | 58                 | 7                      |
| <i>Indels</i>                                                        |                    |                    |                        |
| Indel in coding region producing a frameshift                        | 737                | 35                 | 16                     |
| Deletion of a codon                                                  | 3                  | -                  | -                      |
| Indel in intergenic region                                           | 436                | 25                 | 20                     |
| Indel in intragenic region                                           | 3                  | -                  | -                      |
| <i>Complex variants</i>                                              |                    |                    |                        |
| Indel in coding region producing a frameshift + loss of a stop codon | 3                  | -                  | -                      |
| Codon change + deletion of a codon                                   | 1                  | -                  | -                      |
| DN/DS <sup>1</sup>                                                   | 2.003              | 2.145              | 2.59                   |
| dN/dS <sup>2</sup>                                                   | 1.014              | 1.093              | 1.33                   |
| Total no. of mutations                                               | 6544               | 315                | 123                    |
| Total no. of substitutions                                           | 5363               | 253                | 87                     |
| No. of mutations per strain                                          | 115.02             | 31.50              | 17.57                  |
| No. of substitutions per strain                                      | 94.28              | 25.30              | 12.43                  |

<sup>1</sup> Total number of non-synonymous over synonymous substitutions

<sup>2</sup> Ratio corrected for expected number of synonymous and non-synonymous sites

**Supplementary Table 3: Patterns of substitutions**

|                            | Transitions |           | Transversions |           |           |           |
|----------------------------|-------------|-----------|---------------|-----------|-----------|-----------|
|                            | A:T > G:C   | G:C > A:T | A:T > T:A     | A:T > C:G | G:C > T:A | G:C > C:G |
| <b>Agar HMR (n=57)</b>     |             |           |               |           |           |           |
| Intergenic                 | 377         | 144       | 4             | 17        | 8         | 0         |
| Coding                     | 3069        | 1446      | 46            | 121       | 34        | 21        |
| Synonymous                 | 1039        | 527       | 5             | 18        | 6         | 8         |
| Non-synonymous             | 2030        | 945       | 41            | 103       | 28        | 13        |
| <b>Agar LMR (n=10)</b>     |             |           |               |           |           |           |
| Intergenic                 | 21          | 7         | 2             | 0         | 0         | 1         |
| Coding                     | 134         | 70        | 6             | 5         | 2         | 0         |
| Synonymous                 | 47          | 21        | 0             | 0         | 1         | 0         |
| Non-synonymous             | 87          | 49        | 6             | 5         | 1         | 0         |
| <b>Chemostat HMR (n=7)</b> |             |           |               |           |           |           |
| Intergenic                 | 5           | 1         | 0             | 0         | 1         | 0         |
| Coding                     | 55          | 23        | 0             | 1         | 0         | 0         |
| Synonymous                 | 15          | 7         | 0             | 0         | 0         | 0         |
| Non-synonymous             | 40          | 16        | 0             | 1         | 0         | 0         |

**Supplementary Table 4:** Estimation of global mutation rates per genome per generation<sup>a</sup>.

| Estimation procedure | Ancestral strain <sup>b</sup> | Agar HMR <sup>c</sup> | Agar LMR <sup>d</sup> | Chemostat HMR <sup>e</sup> |
|----------------------|-------------------------------|-----------------------|-----------------------|----------------------------|
| Fluctuation test     | 0.207                         | 0.216                 | 0.021                 | 0.255                      |
| 95% CI               | [0.151;0.271]                 | [0.151;0.288]         | [0.017;0.043]         | [0.109;0.401]              |
| WGS <sup>f</sup>     |                               |                       |                       |                            |
| All mutations        |                               | 0.069                 | 0.019                 | 0.0106                     |
|                      |                               | [0.043;0.105]         | [0.0094;0.0290]       | [0.0082;0.0131]            |
| Substitutions        |                               | 0.057                 | 0.0153                | 0.0075                     |
|                      |                               | [0.035;0.089]         | [0.007;0.022]         | [0.0061;0.0091]            |

<sup>a</sup> Generation time was measured as mass doubling time on the wave front (see **Supplementary Figure 2**).

<sup>b</sup> n=1; <sup>c</sup> n=9 for the fluctuation test and n=57 for WGS; <sup>d</sup> n=10; <sup>e</sup> n=7.

<sup>f</sup> For WGS, we report the 2.5% and 97.5% quantiles of the lineage-specific distributions of mutation rates.

## Supplementary Figures

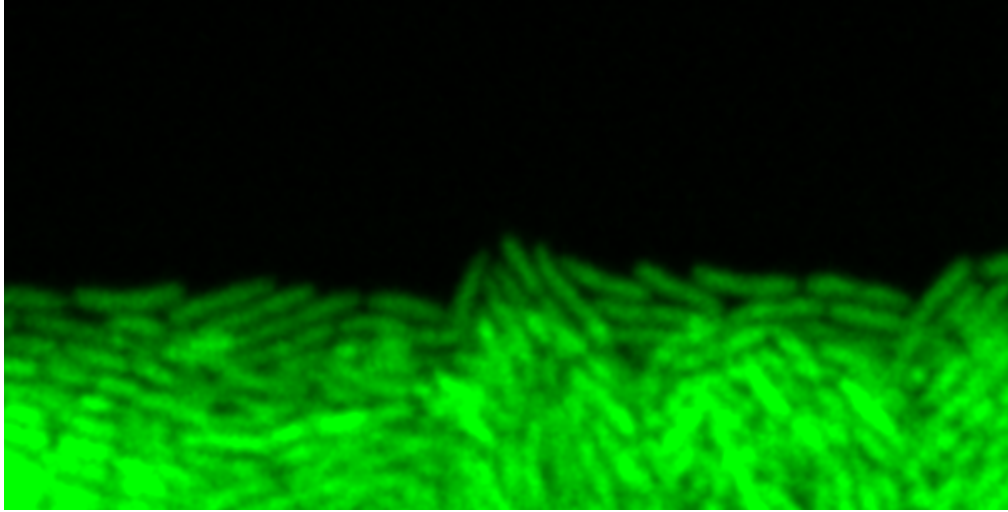

**Supplementary Figure 1: Fluorescence image of bacteria on expanding wave front**

Image of the wave front of an expanding colony after 24h incubation at 37°C. Images were taken by a confocal microscope (Leica TCS SP5) with a 63x dry objective during incubation direct from the agar plate.

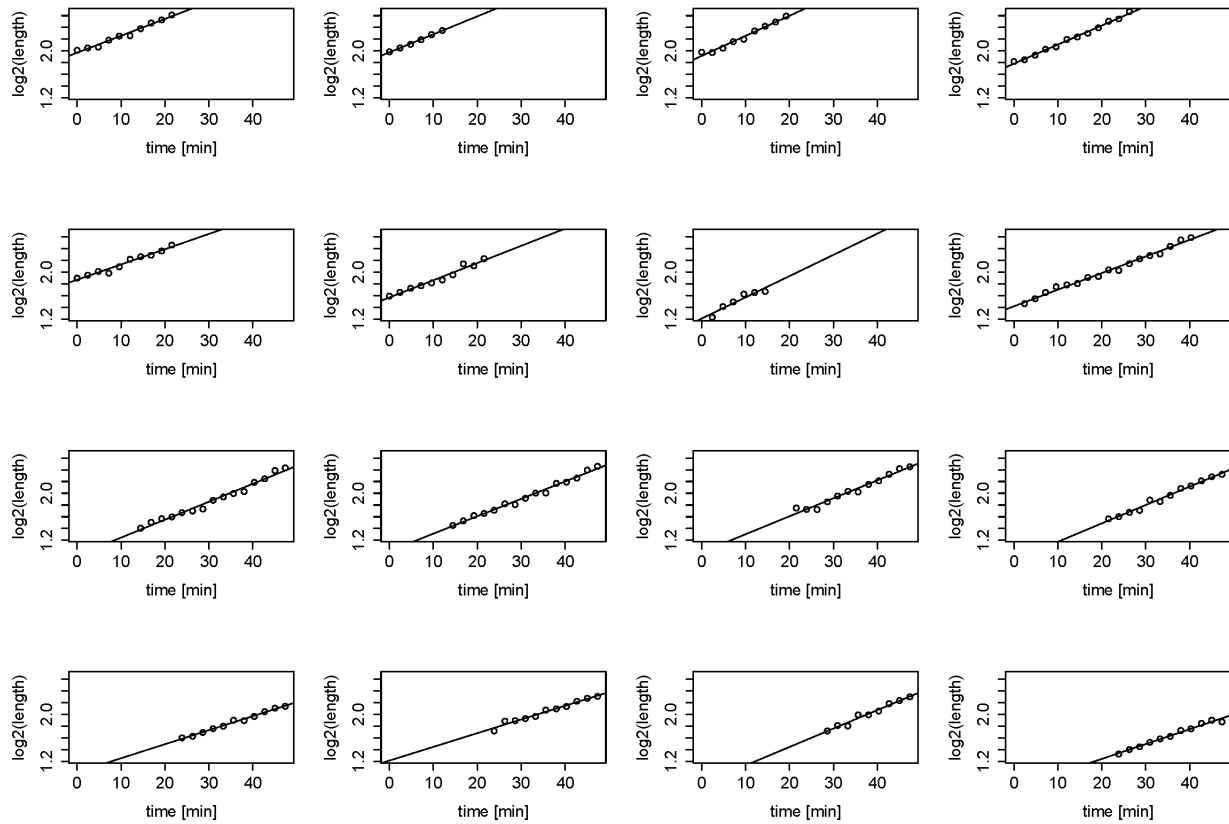

**Supplementary Figure 2: Estimation of generation time of bacteria on expanding wave fronts.**

Generation time was estimated from bacterial mass doubling time, which was computed from video analysis of single bacteria growing on agar wave fronts. The growth rate was determined by calculating the elongation rate under a mixed-effect linear regression model. Estimated generation time: 34.2', 95%CI [33.0, 35.6]

### Provean score distributions

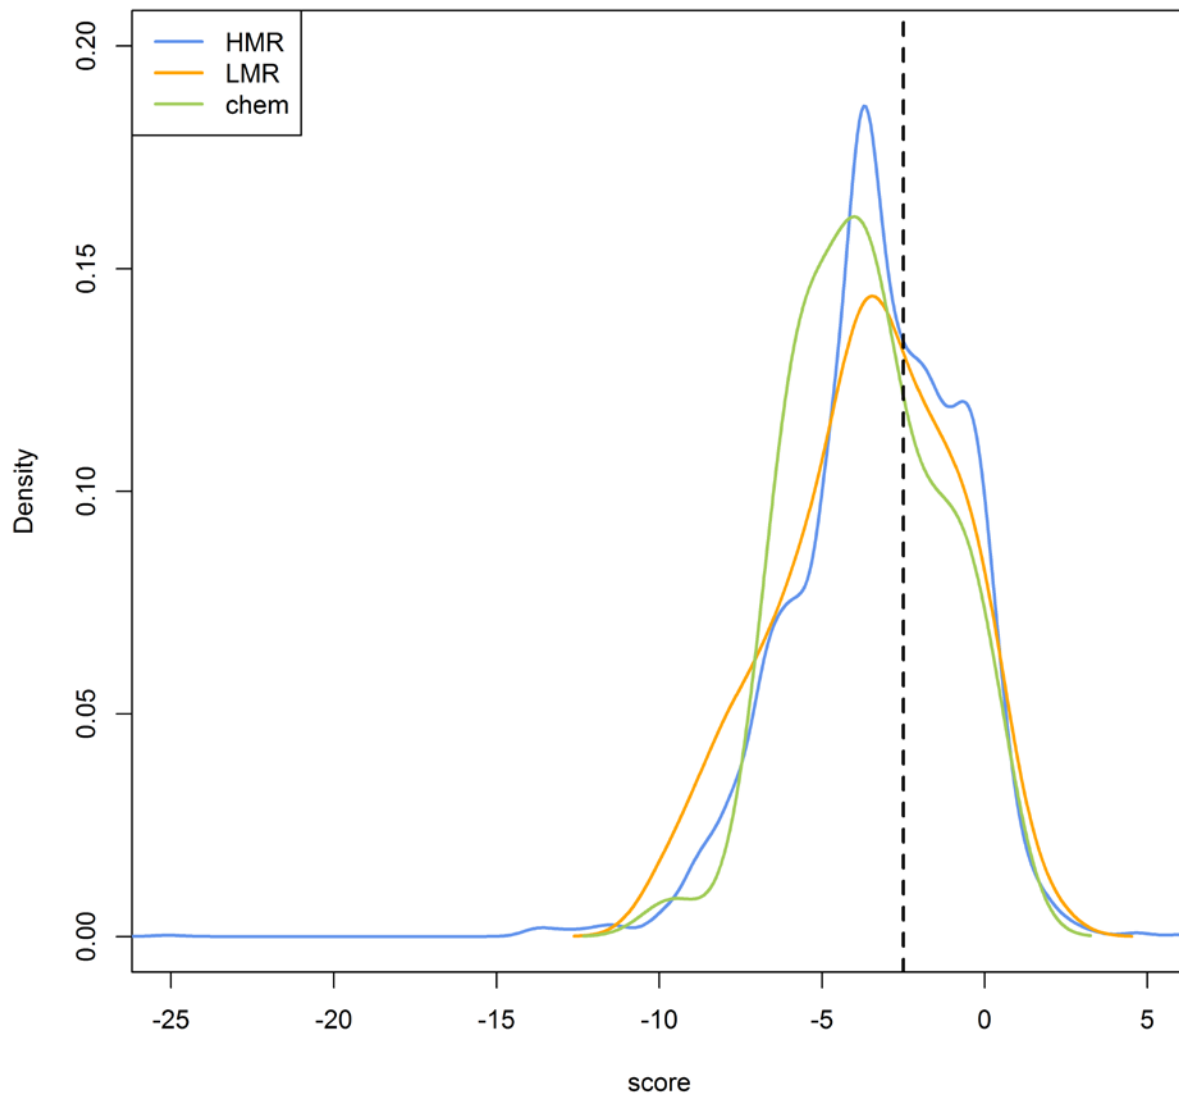

**Supplementary Figure 3: Distribution of PROVEAN scores at non-synonymous sites in HMR, LMR, and chemostat lines.** The distributions between HMR, LMR and chemostat lines are not significantly different from each other according to pairwise Kolmogorov-Smirnov tests. Mutations with a score lower than -2.5 (on the left of the vertical dashed line) are usually considered as having a strong impact on protein function.



# A

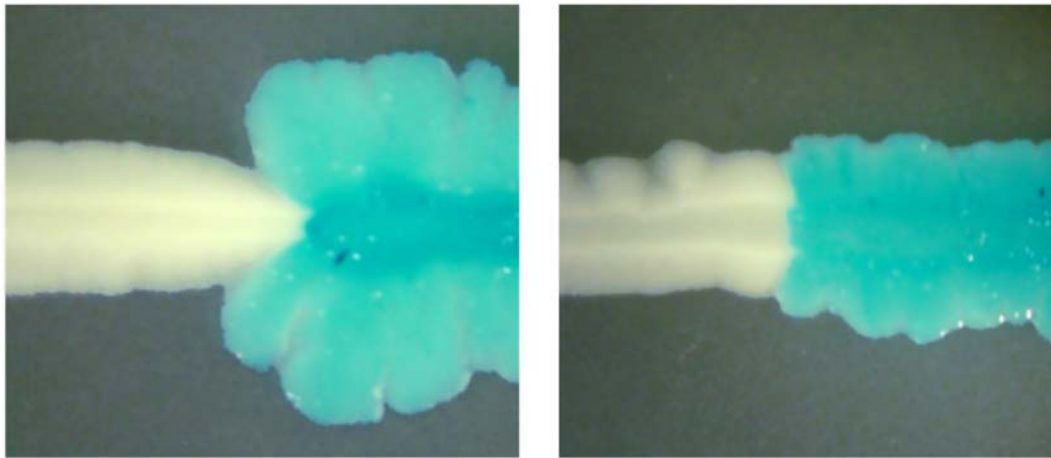

# B

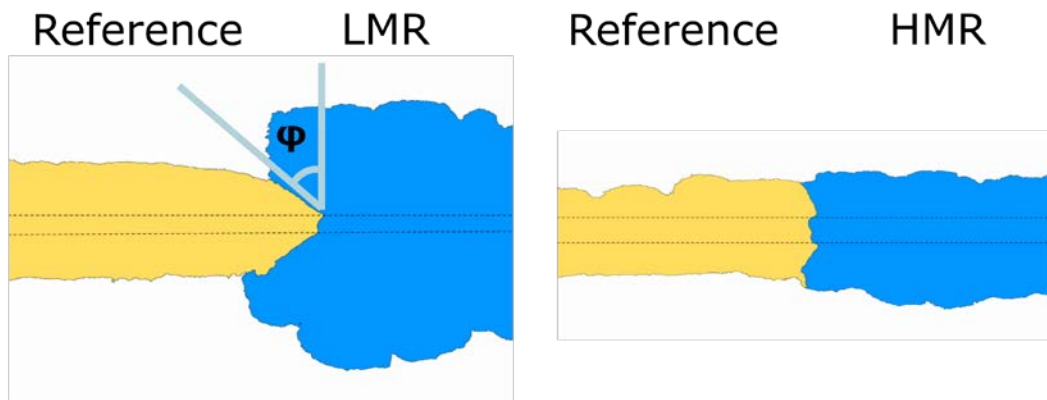

**Supplementary Figure 4: Linear expansion competition experiment on agar.** **A:** Competitive growth of a reference strain (white) and evolved strains (blue) inoculated linearly side by side on agar. **B:** Image processing of the images in B, allowing one to determine the angle ( $\varphi$ ) forming between the reference and evolved strain, allowing one to compute the selection coefficient  $s$  associated to the LMR line according to  $\tan(\varphi) = \sqrt{s(2+s)}$  (KOROLEV *et al.* 2012). In this case, the Low Mutation Rate strain (LMR) on the left pane is clearly growing faster than the reference strain, indicative of a much higher fitness, whereas the High Mutation Rate (HMR) strain on the right pane is growing in a way similar to the reference strain suggesting similar fitness. Note that the reference strain is not the ancestral strain of the HMR and LMR lines.

A

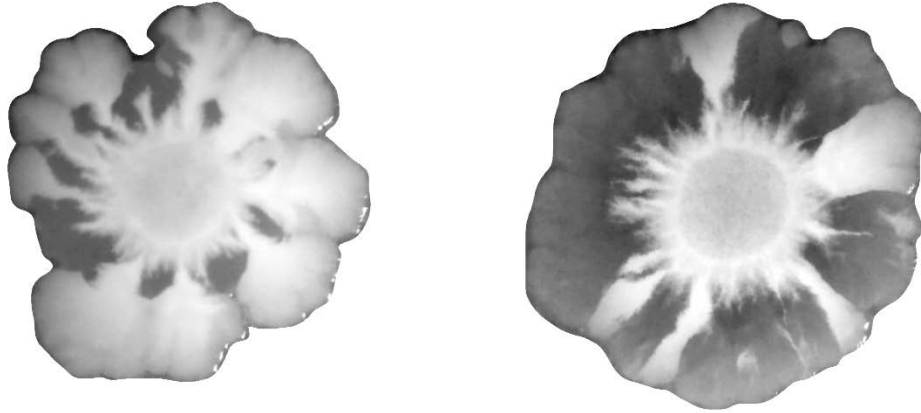

B

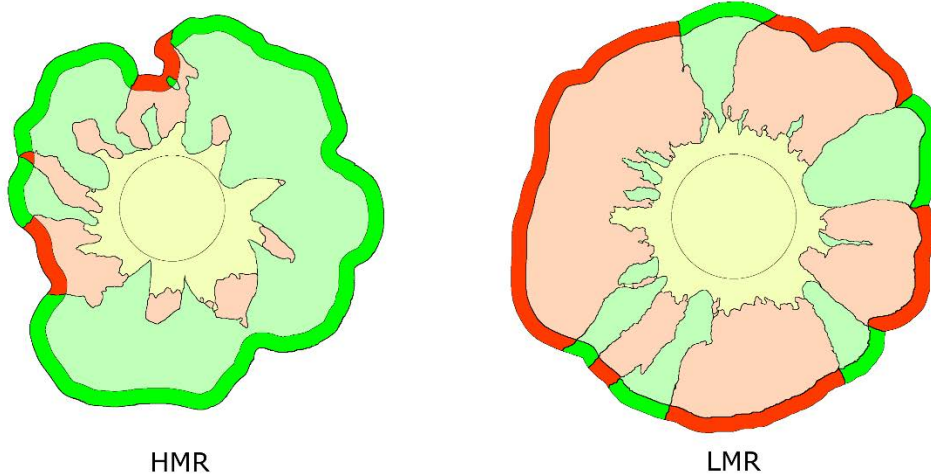

**Supplementary Figure 5: Radial expansion competition experiment on agar.** **A:** Competitive growth of the ancestor strain (white) and evolved strain (black) marked with different fluorescent plasmids. The left panel shows a High Mutation Rate (HMR) strain and the right panel a Low Mutation Rate (LMR) strain. The ancestral and evolved strains were mixed in a 1:1 ratio and inoculated at the center of an agar plate and then let grown for 3 days, like in the long-term experiment. **B:** Processed images. Green: ancestor strain; red: evolved strain, yellow: both strains mixed. The darker colors on the edge of the

colony delimit the wave front where we estimated the relative proportions of the two strains, as reported in **Fig. 4B**.

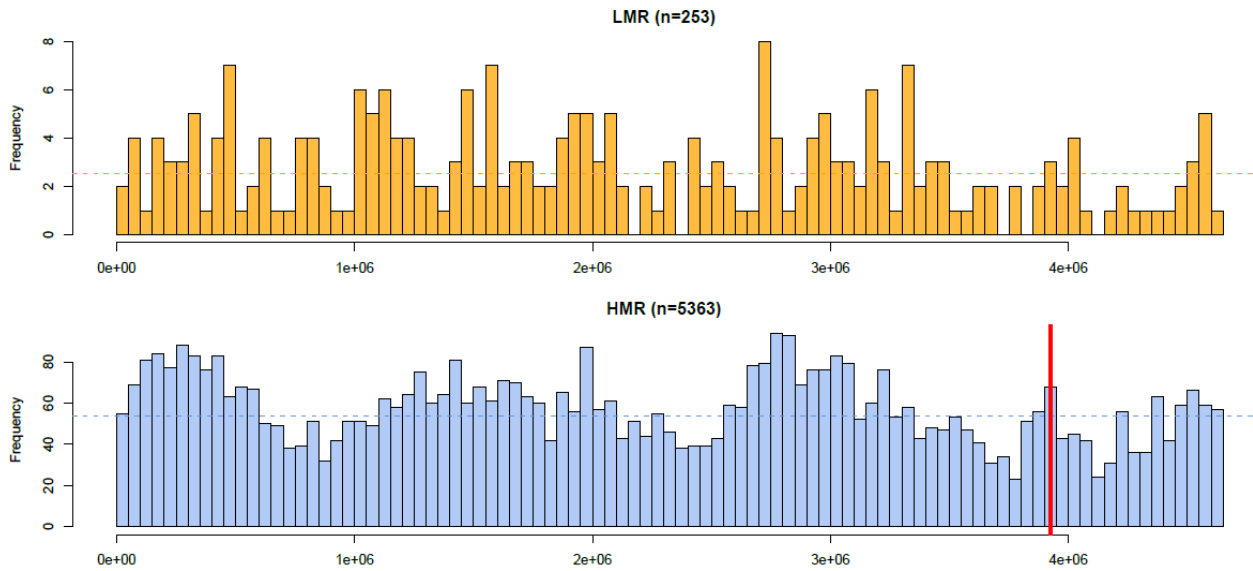

**Supplementary Figure 6: Genomic distribution of the number of mutations occurring in LMR and HMR lines.** Dashed lines represent the genomic average in each condition. The position of the origin of genome replication (*oriC*) is marked with a vertical red line.

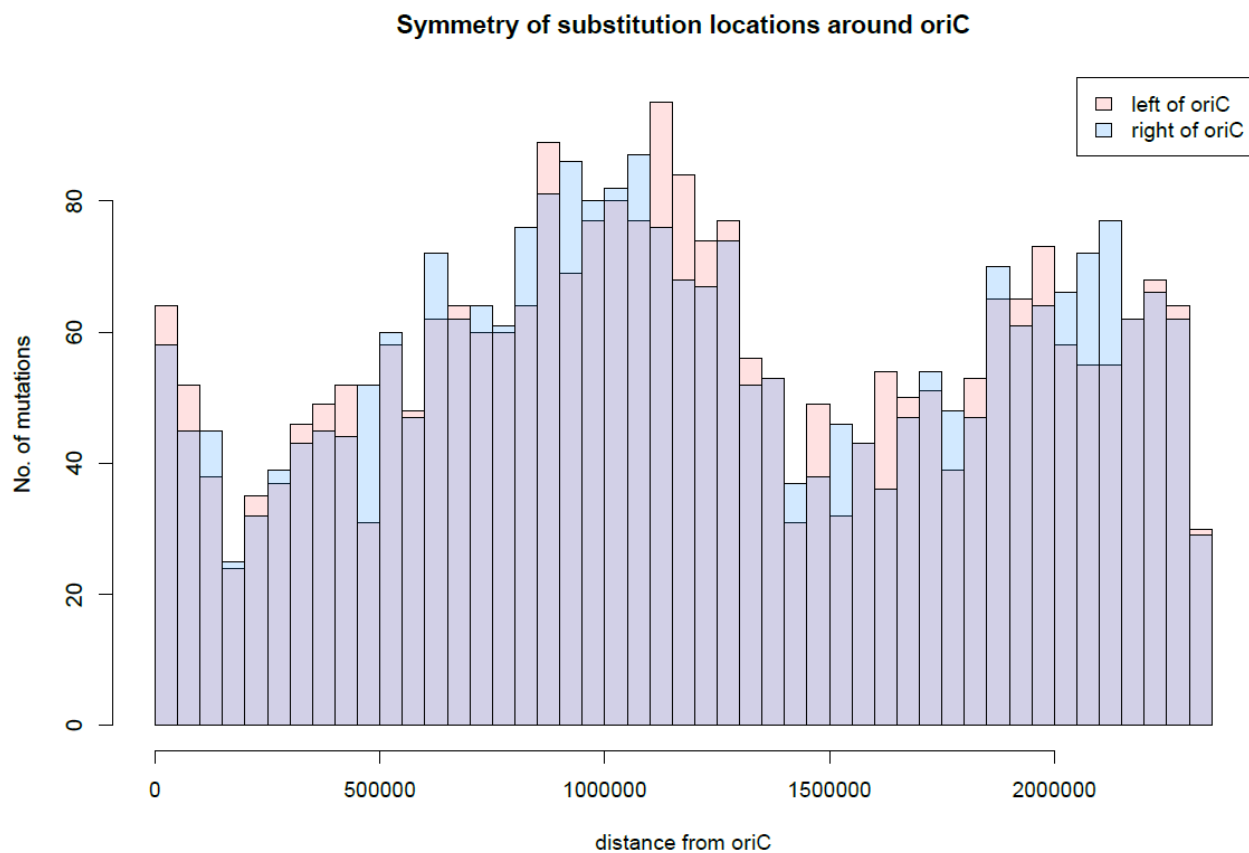

**Supplementary Figure 7: Symmetry in the distribution of substitutions around *oriC*.** The total number of substitution is symmetric ( $R^2=0.7$ ,  $p\text{-val}=2.05\times 10^{-13}$ ) around the origin of replication *oriC* (map position 3,880,349-3,881,752, as shown in **Supplementary Figure 2**), as previously shown by FORSTER *et al.* (2013).

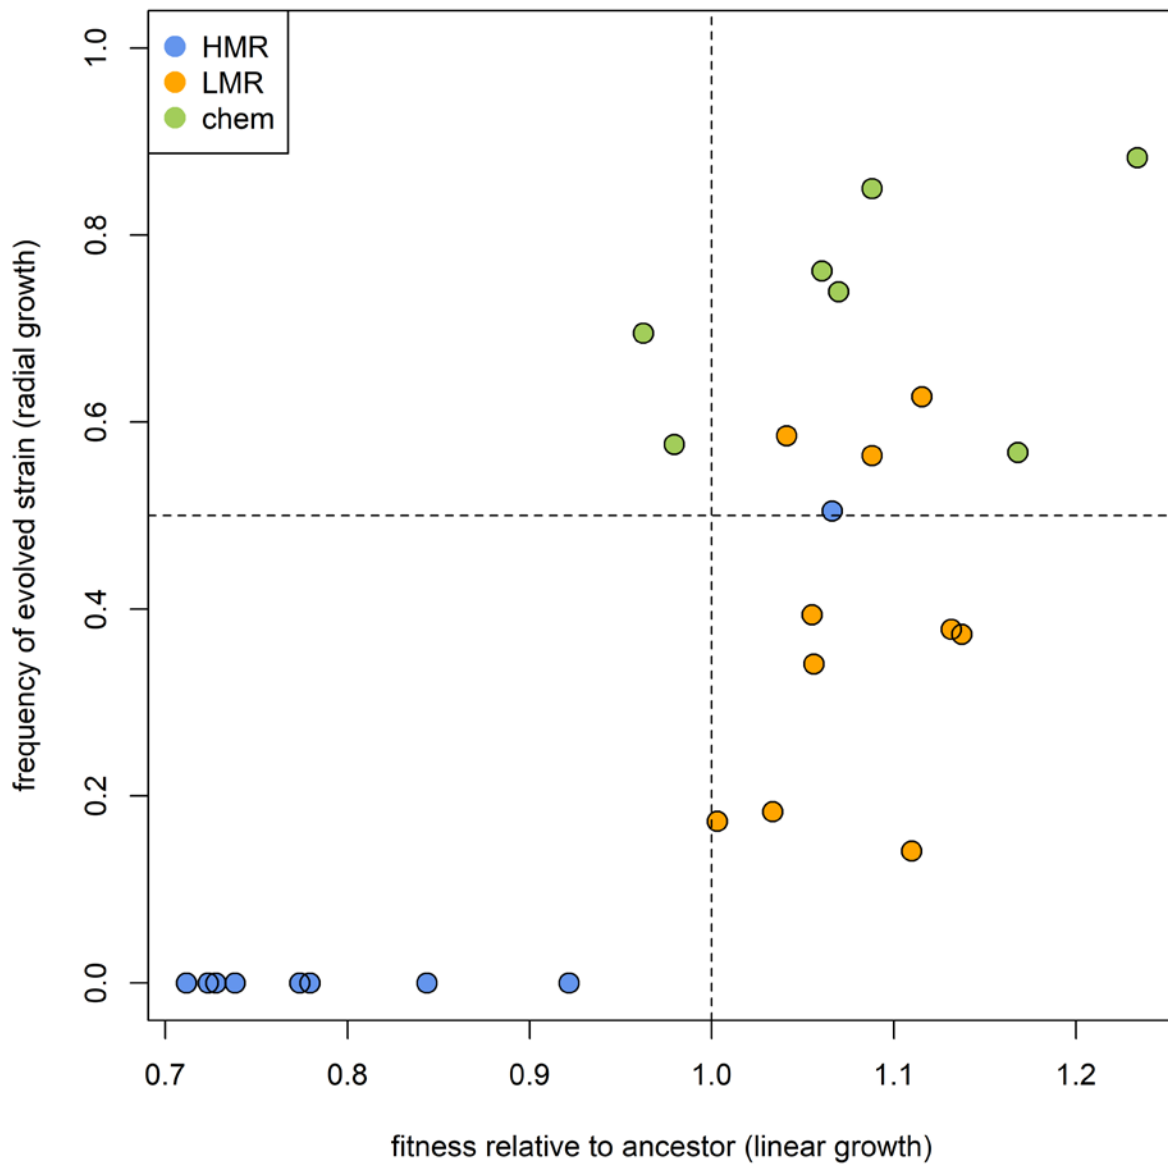

**Supplementary Figure 8.** Comparison of frequency of evolved strain in a radial competition assay and linear spatial growth rate. Each point shows the relative frequency of the evolved strain after a radial competition experiment with the ancestral strain (as shown in **Fig. 4A**) and the linear spatial growth rate relative to the ancestral strain (as shown in **Fig. 4B**) for a single evolved HMR, LMR or chemostat line.

## References

- FOSTER, P. L., A. J. HANSON, H. LEE, E. M. POPODI AND H. TANG, 2013 On the mutational topology of the bacterial genome. *G3 (Bethesda)* **3**: 399-407.
- KOROLEV, K. S., M. J. MULLER, N. KARAHAN, A. W. MURRAY, O. HALLATSCHEK *et al.*, 2012 Selective sweeps in growing microbial colonies. *Phys Biol* **9**: 026008.
